# Supplementary material for: Cannabis Use and Trajectories of Depression and Stress Across the Prenatal Period
Source: PubMed Central journal article supplement (PMC11653121; doi:10.1001/jamanetworkopen.2024.51597), 2024-12-17
Supplement: jamanetwopen-e2451597-s002.pdf [file jamanetwopen-e2451597-s002.pdf]

## Data Sharing Statement

Constantino-Pettit. Cannabis Use and Trajectories of Depression and Stress Across the Prenatal Period. *JAMA Netw Open*. Published December 17, 2024.  
doi:10.1001/jamanetworkopen.2024.51597

### Data

**Data available:** No
